# Supplementary material for: Charge self-regulation of Ti sites in Ti3C2 MXene via rich unsaturated Ti for boosted photocatalytic hydrogen generation
Source: Royal Society of Chemistry journal article supplement (doi:10.1039/d4tc01076k), 2024-01-01
Supplement: d4tc01076k1.pdf [file d4tc01076k1.pdf]

## Supporting Information

# Charge self-regulation of $\text{Ti}_3\text{C}_2$ MXene via rich unsaturated Ti sites for boosted photocatalytic hydrogen generation

Ying Cao<sup>a</sup>, Ping Wang<sup>a,\*</sup>, Xuefei Wang<sup>a</sup>, Feng Chen<sup>a</sup>, Huogen Yu<sup>a,b,\*</sup>

<sup>a</sup> School of Chemistry, Chemical Engineering and Life Sciences, Wuhan University of  
Technology, Wuhan 430070, PR China

<sup>b</sup> Laboratory of Solar Fuel, Faculty of Materials Science and Chemistry, China  
University of Geosciences, Wuhan, 430074, PR China

\*Corresponding authors. Tel: +86(27)87749379;

E-mail: wangping0904@whut.edu.cn (Ping Wang);

huogenyu@163.com (Huogen Yu)

## SI Experimental

### SI-1 Photoelectrochemical measurements

Photoelectrochemical (PEC) curves were measured on an electrochemical analyzer (CHI660E, China) in a standard three-electrode configuration according to our previous works<sup>[1]</sup>. The prepared samples were loaded on fluorine-doped tin oxide (FTO) conductor glass, a standard Ag/AgCl electrode and the platinum foil as the working electrodes, reference electrode and counter electrode, respectively, with Na<sub>2</sub>SO<sub>4</sub> (0.5 mol L<sup>-1</sup>) as the electrolyte solution. The method of working electrodes was the same as in our previous works. Linear sweep voltammetry (LSV) curves were obtained in the potential ranging of -1.0 to -1.6 V with a scan rate of 10 mV s<sup>-1</sup>. Transient photocurrent responses with time (*i-t* curves) were recorded at 0.5 V bias potential during periodic ON/OFF illumination cycles under a 3W LED lamp (365 nm). Electrochemical impedance spectroscopy (EIS) curves were conducted at the frequency range of 0.01-10<sup>5</sup> Hz with an ac amplitude of 10 mV under the open-circuit voltage.

### SI-2 Density functional theory calculation

The calculations were carried out by using the Vienna *ab initio* simulation package (VASP)<sup>[1-3]</sup>. The generalized gradient approximation (GGA) with Perdew-Burke-Ernzerhof (PBE) functional was selected to reveal the exchange-correlation interaction. The cutoff energy and Monkhorst-Pack k-point mesh was set as 450 eV and 3 × 3 × 1, respectively. The convergence threshold  $\epsilon$  for total energy converged

within  $10^{-5}$  eV/atom and  $0.01$  eV·Å<sup>-1</sup> for force. The partial occupancies are determined using the Gaussian smearing scheme with smearing width of 0.2 eV. To eliminate interactions between periodic structures, a vacuum of 15 Å was added. The Gibbs free energy of H atom adsorption ( $\Delta G_{H^*}$ ) was defined as following the equation S1:

$$\Delta G_{H^*} = \Delta E_{H^*} + \Delta E_{ZPE} - T\Delta S_H \quad (S1)$$

where  $\Delta E_{H^*}$ ,  $\Delta E_{ZPE}$ ,  $T\Delta S_H$  are the differential hydrogen  $\Delta E_{H^*}$  adsorption energy, the change in zero-point energy and entropy between the adsorbed hydrogen and molecular hydrogen in gas phase, respectively, and  $T$  is the temperature. By default the entropy of H<sub>2</sub> gas at 298 K is  $130$  J·mol<sup>-1</sup>·K<sup>-1</sup>, so the term  $T\Delta S_H$  was calculated to be  $-0.20$  eV. In this work, Ti<sub>3</sub>C<sub>2</sub> model was constructed by removing Al atom in the Ti<sub>3</sub>AlC<sub>2</sub> (002) model. The (3 × 3 × 1) supercell containing 27 Ti and 18 C atoms of crystalline. Ti<sub>3</sub>C<sub>2</sub>F<sub>x</sub> structure was added 6 F atoms on the basis of Ti<sub>3</sub>C<sub>2</sub> model and performed for the following theoretical calculations. On the basis of Ti<sub>3</sub>C<sub>2</sub>F<sub>x</sub> model, the Ti<sub>3</sub>C<sub>2</sub>F<sub>x</sub>-U (002) model composed of 27 Ti atoms, 17 C atoms and 6 F atoms is constructed by digging out a carbon atom to simulate the broken Ti-C bonds and some surrounding saturated Ti atoms convert to unsaturated state. As a result, U in the Ti<sub>3</sub>C<sub>2</sub>F<sub>x</sub>-U model represent the unsaturated Ti active sites with insufficient coordination. Additionally, three configurations are possible for the chemical F terminations on Ti<sub>3</sub>C<sub>2</sub>F<sub>x</sub>-U system: (1) F functional groups located on the top of C atoms; (2) F functional groups located on the top of transition Ti metals; (3) F functional groups on top of the hollow sites (neither on the top of Ti metals nor C

atoms). The work function is defined as  $\Phi = E_v - E_f$ , where  $E_v$  and  $E_f$  are the electrostatic potentials of the vacuum and Fermi levels, respectively.

## References

1. H. Long, P. Wang, X. Wang, F. Chen, H. Yu, *Appl. Sur. Sci.* 2022, **604**, 154457.
2. D. Gao, H. Long, X. Wang, J. Yu, H. Yu, *Adv. Funct. Mater.*, 2022, **34**, 210847.
3. W. Zhong, B. Zhao, X. Wang, P. Wang, H. Yu, *ACS Catal.*, 2023, **13**, 749-756.

|                                            |             |
|--------------------------------------------|-------------|
| <b>Supporting Information Content.....</b> | <b>Page</b> |
| <b>Table S1.....</b>                       | <b>S6</b>   |
| <b>Fig. S1.....</b>                        | <b>S7</b>   |
| <b>Fig. S2.....</b>                        | <b>S8</b>   |
| <b>Fig. S3.....</b>                        | <b>S9</b>   |
| <b>Fig. S4.....</b>                        | <b>S10</b>  |
| <b>Fig. S5.....</b>                        | <b>S11</b>  |
| <b>Fig. S6.....</b>                        | <b>S12</b>  |

**Table S1** Composition of the various samples based on the XPS result.

| Sample                                               | Ti-C  | Ti <sup>3+</sup> + Ti <sup>2+</sup> |
|------------------------------------------------------|-------|-------------------------------------|
| Ti <sub>3</sub> C <sub>2</sub> F <sub>x</sub>        | 32.6% | 23.4%                               |
| Ti <sub>3</sub> C <sub>2</sub> F <sub>x</sub> -20°C  | 28.4% | 29.8%                               |
| Ti <sub>3</sub> C <sub>2</sub> F <sub>x</sub> -60°C  | 23.2% | 35.1%                               |
| Ti <sub>3</sub> C <sub>2</sub> F <sub>x</sub> -100°C | 21.5% | 31.0%                               |
| Ti <sub>3</sub> C <sub>2</sub> F <sub>x</sub> -140°C | 6.7%  | 9.5%                                |

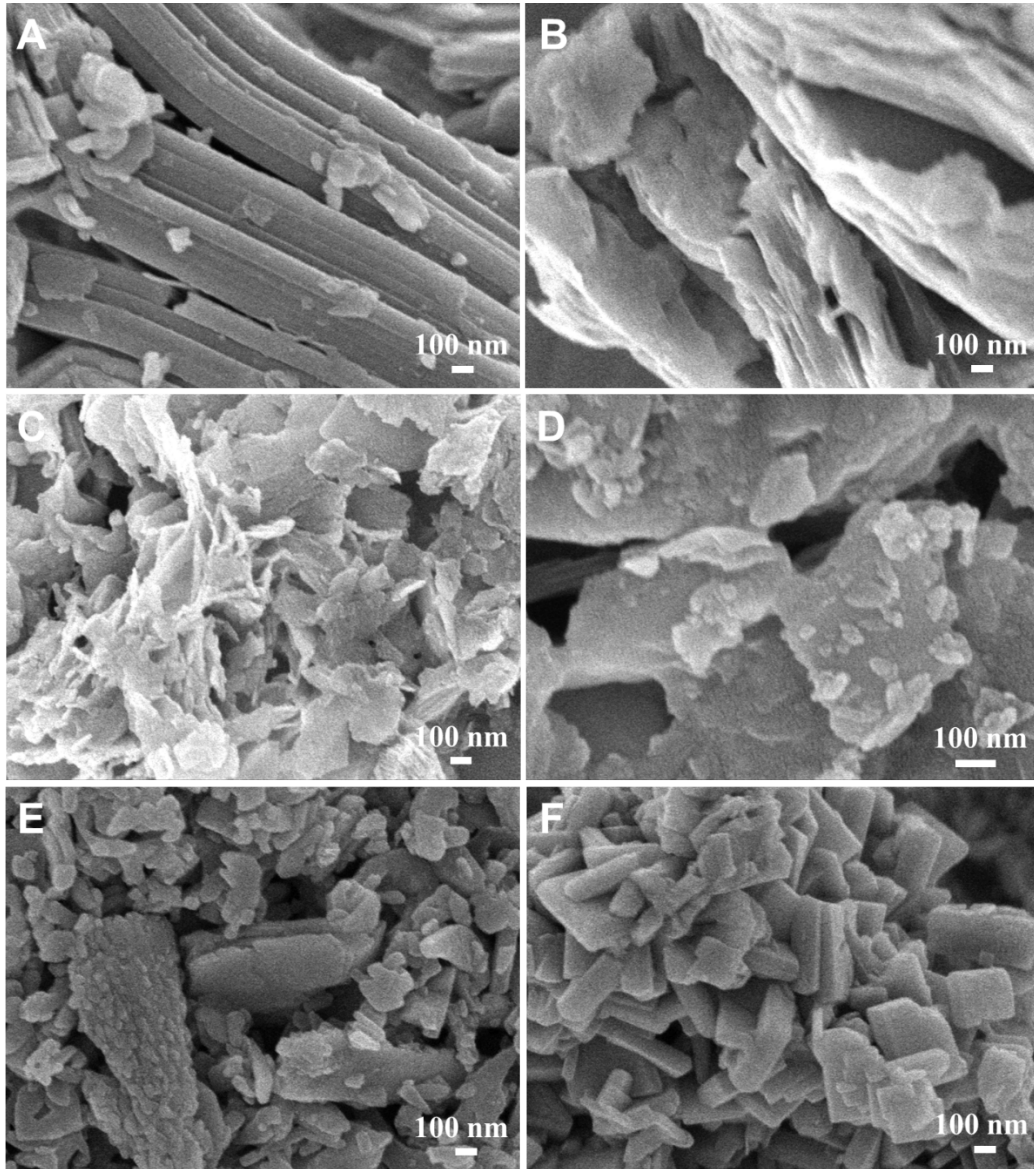

**Fig. S1.** FESEM images of (A)  $\text{Ti}_3\text{AlC}_2$ , (B)  $\text{Ti}_3\text{C}_2\text{F}_x$ , (C)  $\text{Ti}_3\text{C}_2\text{F}_x$ -20°C, (D)  $\text{Ti}_3\text{C}_2\text{F}_x$ -60°C, (E)  $\text{Ti}_3\text{C}_2\text{F}_x$ -100°C, and (F)  $\text{Ti}_3\text{C}_2\text{F}_x$ -140°C after ultrasonic intercalation.

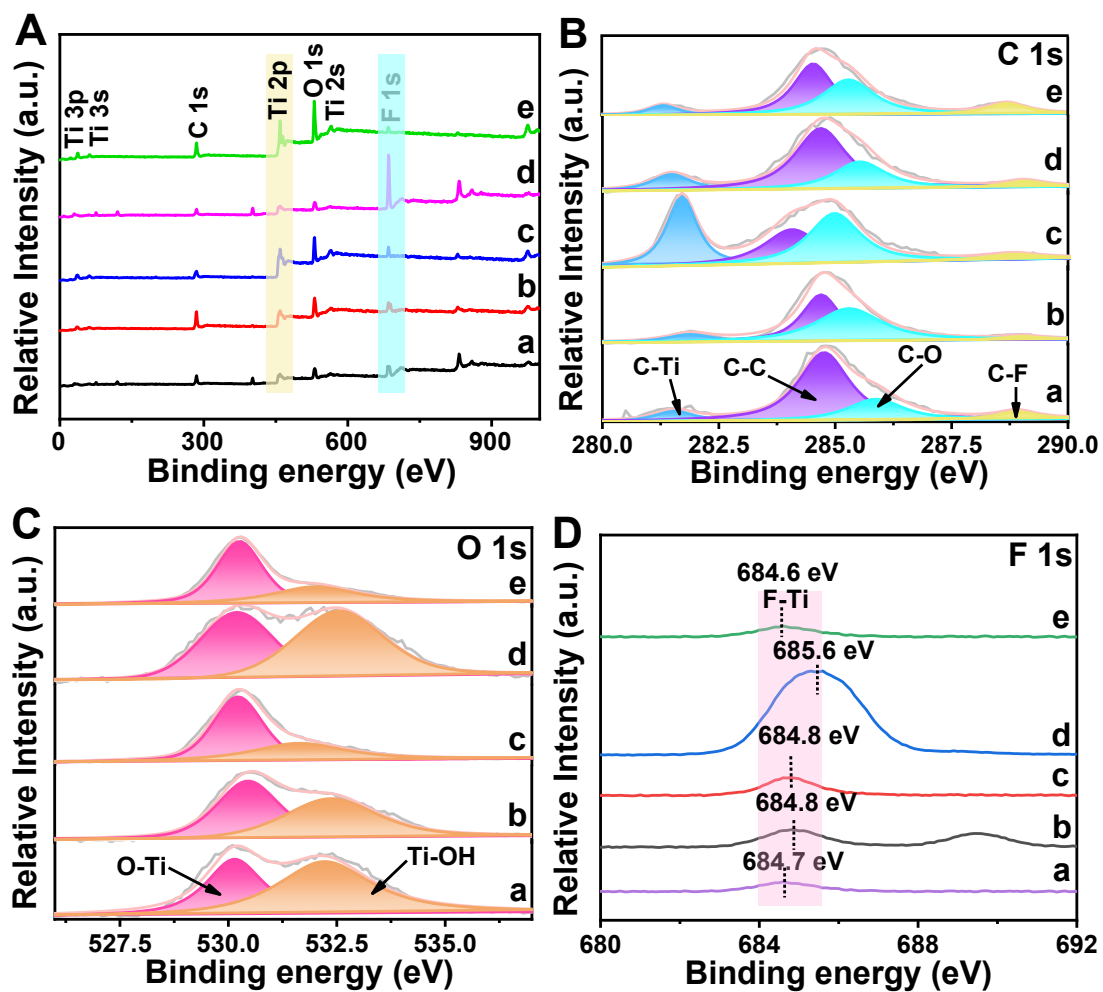

**Fig. S2.** (A) XPS survey spectra and the high-resolution spectra of (B) C 1s, (C) O 1s, (D) F 1s for (a)  $\text{Ti}_3\text{C}_2\text{F}_x$ , (b)  $\text{Ti}_3\text{C}_2\text{F}_x$ -20°C, (c)  $\text{Ti}_3\text{C}_2\text{F}_x$ -60°C, (d)  $\text{Ti}_3\text{C}_2\text{F}_x$ -100°C, and (e)  $\text{Ti}_3\text{C}_2\text{F}_x$ -140°C.



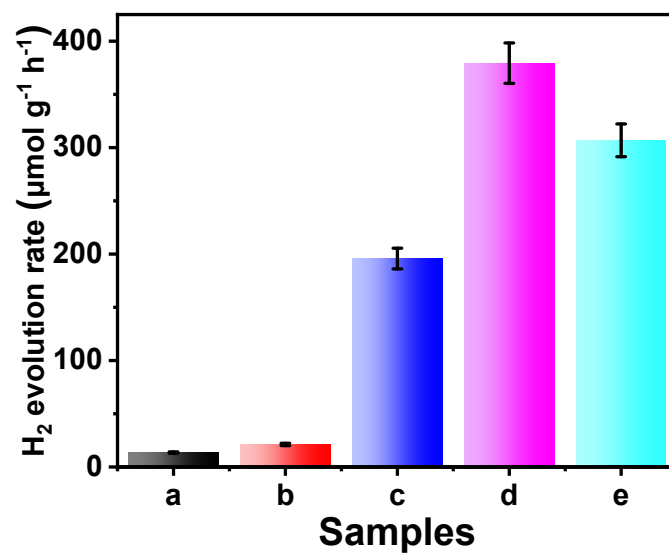

**Fig. S3** Photocatalytic H<sub>2</sub>-evolution rate of (a) TiO<sub>2</sub>, (b) Ti<sub>3</sub>C<sub>2</sub>F<sub>x</sub>-60°C/TiO<sub>2</sub>(0.1 wt%), (c) Ti<sub>3</sub>C<sub>2</sub>F<sub>x</sub>-60°C/TiO<sub>2</sub>(1 wt%), (d) Ti<sub>3</sub>C<sub>2</sub>F<sub>x</sub>-60°C/TiO<sub>2</sub>(5 wt%) (as Ti<sub>3</sub>C<sub>2</sub>F<sub>x</sub>-60°C/TiO<sub>2</sub>), and (e) Ti<sub>3</sub>C<sub>2</sub>F<sub>x</sub>-60°C/TiO<sub>2</sub>(10 wt%).

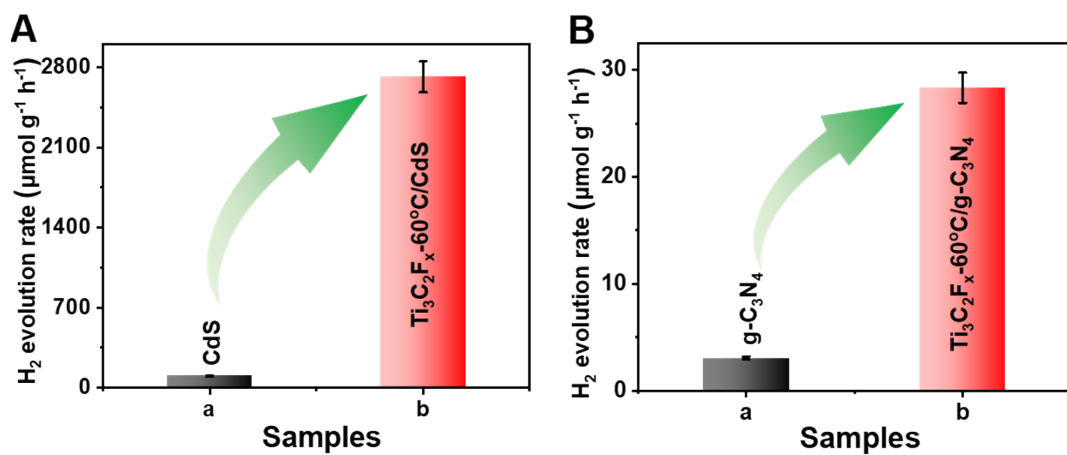

**Fig. S4.** The photocatalytic H<sub>2</sub>-evolution rate of (A) (a) CdS, (b) Ti<sub>3</sub>C<sub>2</sub>F<sub>x</sub>-60°C/CdS and (B) (a) g-C<sub>3</sub>N<sub>4</sub>, (b) Ti<sub>3</sub>C<sub>2</sub>F<sub>x</sub>-60°C/g-C<sub>3</sub>N<sub>4</sub>.

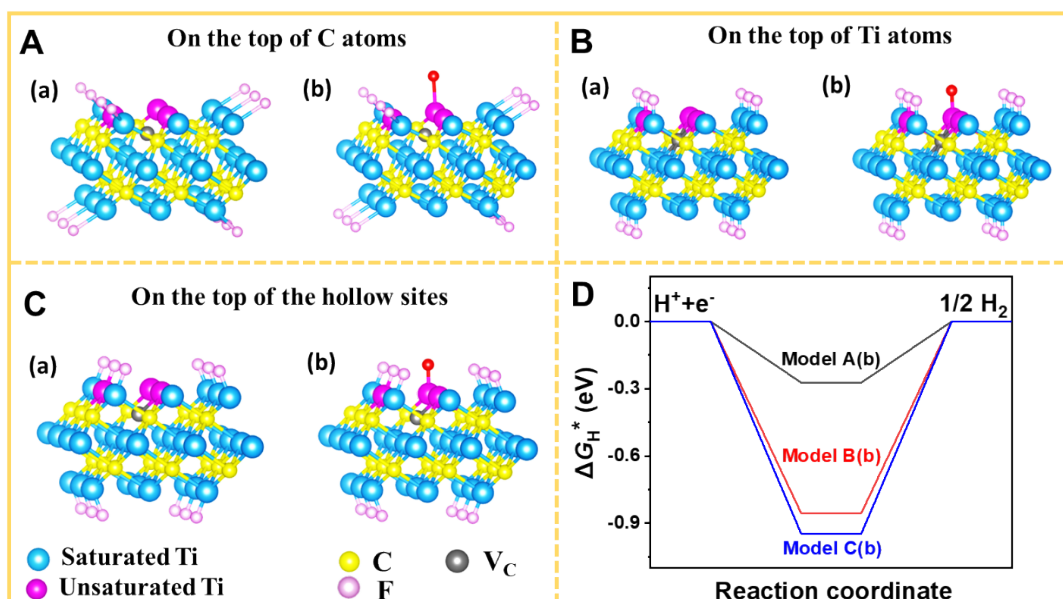

**Fig. S5** (A-C) Three configurations are possible for the F chemical terminations on  $Ti_3C_2F_x$ -U models: (a) before H adsorption and (b) after H adsorption and (D) Gibbs free energy profiles ( $\Delta G_{H^*}$ ) for  $H_{ads}$  adsorption on Ti sites in different F terminated positions.

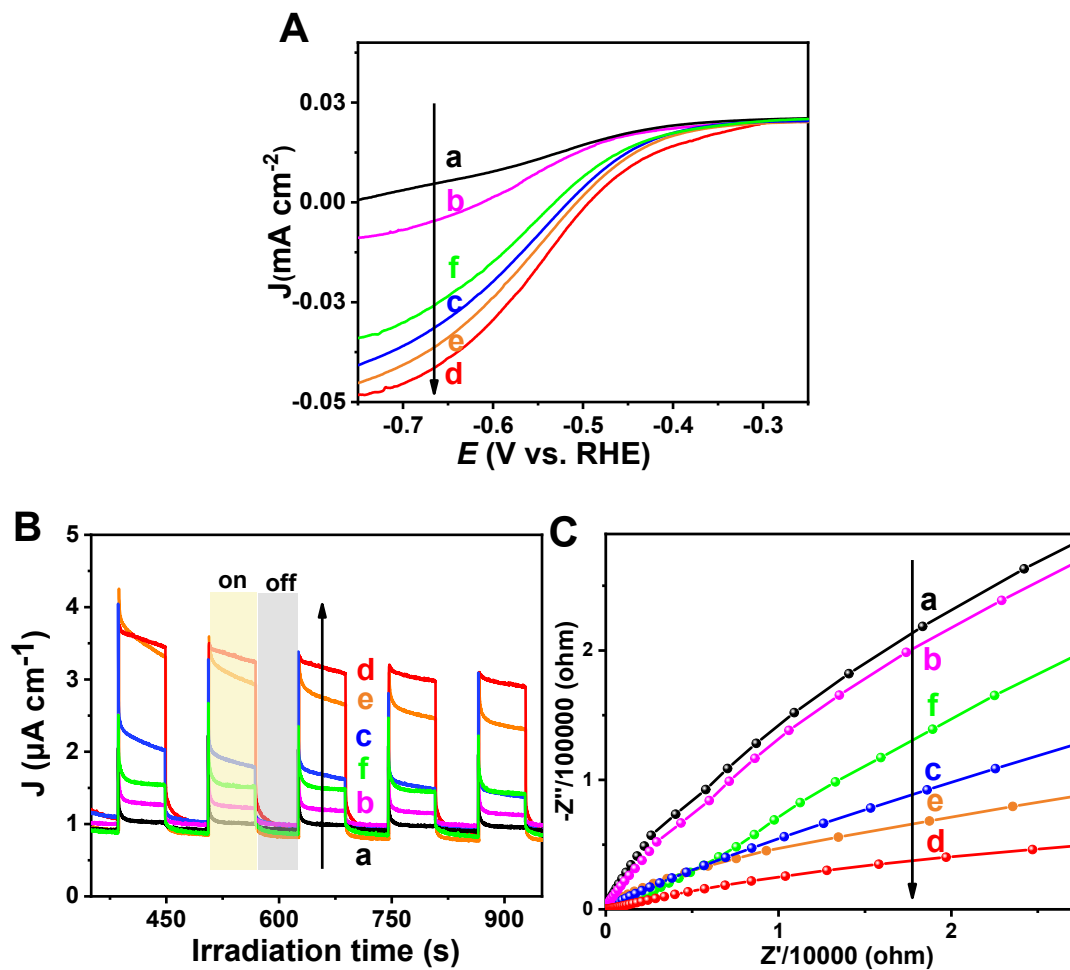

**Fig. S6.** (A) Linear sweep voltammetry (LSV) curves, (B) transient photocurrent response, and (C) electrochemical impedance (EIS) spectra of (a) TiO<sub>2</sub>, (b) Ti<sub>3</sub>C<sub>2</sub>F<sub>x</sub>/TiO<sub>2</sub>, (c) Ti<sub>3</sub>C<sub>2</sub>F<sub>x</sub>-20°C/TiO<sub>2</sub>, (d) Ti<sub>3</sub>C<sub>2</sub>F<sub>x</sub>-60°C/TiO<sub>2</sub>, (e) Ti<sub>3</sub>C<sub>2</sub>F<sub>x</sub>-100°C/TiO<sub>2</sub>, and (f) Ti<sub>3</sub>C<sub>2</sub>F<sub>x</sub>-140°C/TiO<sub>2</sub>.
